# Supplementary material
Source: publisher site journal article supplement (https://www.spandidos-publications.com/374/downloadSupplementary)

Figure S1. ERK MAPK/ERK signaling and miRNAs. Networks were generated utilizing Ingenuity Pathway Analysis (IPA®), QIAGEN Redwood City, [www.qiagen.com/ingenuity](http://www.qiagen.com/ingenuity)).

ERK/MAPK Signaling

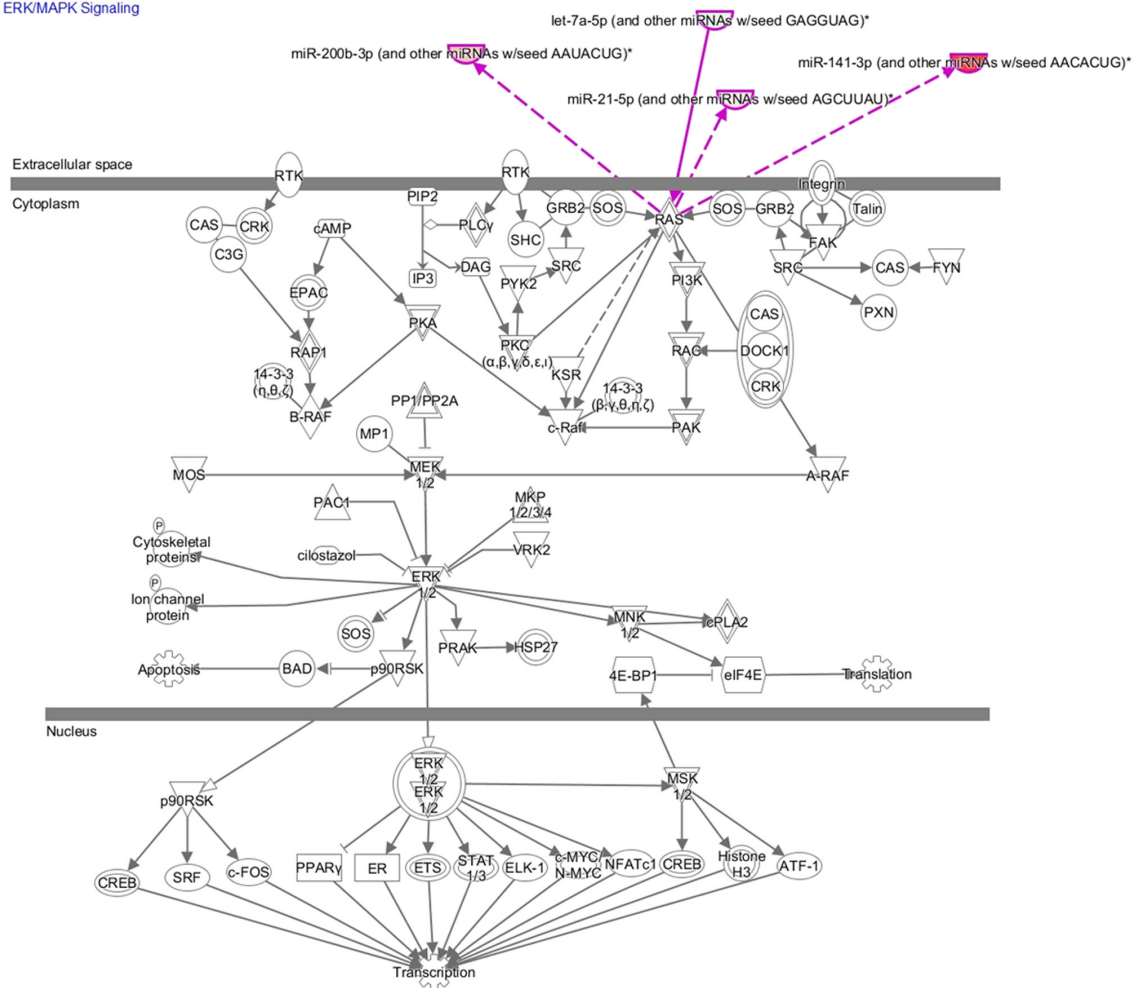

Supplement: Supplementary file 1 [file downloadSupplementary]
